# Supplementary material
Source: MDPI journal article supplement (https://www.mdpi.com/2071-1050/16/5/2116)
Supplement: s1 [file s1]

**Supplementary Materials. Table S1.**—Information collected from the silos in Portugal’s EPAC network.

| Region   | District   | Town/Village          | Geolocation                 | Year construction | Extension year | Ownership | Use | State of conservation | Category | Capacity (t) | Height (m) | Ground plan | Roof shape | Tower position | No. of storage cells | No. of rows of cells | No. of rows of internal cells | Shape of cells | Cell dimensions (m) | Facade types | Constr. Mat. | Receiving machinery cap. (t/h) | No. elevators | N° upper storey horizontal conveyors | N° down storey horizontal conveyors | Firefighting system | Lift | Thermometric sensors | Railway | Lorry weighbridge (t) | Railway weighbridge (t) |
|----------|------------|-----------------------|-----------------------------|-------------------|----------------|-----------|-----|-----------------------|----------|--------------|------------|-------------|------------|----------------|----------------------|----------------------|-------------------------------|----------------|---------------------|--------------|--------------|--------------------------------|---------------|--------------------------------------|-------------------------------------|---------------------|------|----------------------|---------|-----------------------|-------------------------|
| Alentejo | Beja       | Aljustrel             | 37°52'47.0"N<br>8°09'25.7"W | 1970              | 1973/78        | LC        | GS  | 1                     | CF       | 14,500       | 37.5       | S           | F          | FT             | 43                   | 3                    | 2                             | C              | 5.4                 | SII          | RC           | 120                            | 2             | 2                                    | 2                                   | N                   | Y    | N                    | N       | 30                    |                         |
| Alentejo | Beja       | Inside Beja           | 38°01'18.2"N<br>7°51'38.2"W | 1961              |                | LC        | WU  | 2                     | CF       | 15,000       | 45.0       | S           | 2          | FT             | 28                   | 3                    | 2                             | C              | 6.3                 | SII          | RC           | 240                            | 3             | 3                                    | 2                                   | Y                   | Y    | N                    | N       | 30                    |                         |
| Alentejo | Beja       | Outside Beja          | 38°01'55.6"N<br>7°52'15.5"W | 1977              | 1981           | PS        | GS  | 1                     | CF       | 26,500       | 70.0       | S           | 2          | FT             | 48                   | 3                    | 2                             | C              | 7.0                 | SII          | RC           | 360                            | 3             | 3                                    | 2                                   | Y                   | Y    | N                    | Y       | 60+100                | 200                     |
| Alentejo | Beja       | Cuba                  | 38°09'57.5"N<br>7°53'49.4"W | 1973              | 1980           | LC        | GS  | 1                     | CF       | 23,500       | 42.5       | S           | F          | FT             | 35                   | 2                    | 1                             | C              | 6.5                 | SIII         | RC           | 120                            | 2             | 2                                    | 1                                   | N                   | Y    | N                    | Y       | 50                    | 200                     |
| Alentejo | Beja       | Ferreira do Alentejo  | 38°03'44.9"N<br>8°07'10.8"W | 1973              | 1976           | LC        | GS  | 1                     | CF       | 23,500       | 44.1       | S           | F          | FT             | 32                   | 2                    | 1                             | C              | 6.5                 | SIII         | RC           | 120                            | 2             | 2                                    | 1                                   | Y                   | Y    | N                    | N       | 60                    |                         |
| Alentejo | Beja       | Mertola               | 37°38'12.5"N<br>7°39'39.2"W | 1938              |                | PS        | WU  | 2                     | R        | 4,500        | 37.5       | S           | F          | ST             | 17                   | 2                    |                               | S              | 2.3                 | ST           | RB           | 120                            | 2             | 2                                    | 1                                   | N                   | N    | N                    | N       | 50                    |                         |
| Alentejo | Beja       | Moura                 | 38°08'10.3"N<br>7°26'47.4"W | 1974              |                | LC        | GS  | 1                     | R        | 10,000       | 43.2       | S           | F          | FT             | 17                   | 2                    | 1                             | C              | 6.5                 | SII          | RC           | 120                            | 2             | 2                                    | 1                                   | N                   | Y    | N                    | N       | 30+60                 |                         |
| Alentejo | Beja       | Serpa                 | 37°56'49.8"N<br>7°36'16.0"W | 1974              | 1980           | LC        | GS  | 1                     | CF       | 19,000       | 44.1       | S           | F          | FT             | 32                   | 2                    | 1                             | C              | 6.5                 | SIII         | RC           | 120                            | 2             | 2                                    | 1                                   | Y                   | Y    | N                    | N       | 30+60                 |                         |
| Alentejo | Evora      | Estremoz              | 38°50'36.9"N<br>7°34'50.5"W | 1973              | 1979           | PS        | WU  | 2                     | CF       | 16,000       | 43.4       | L           | 2          | FT             | 29                   | 2                    | 1                             | C              | 6.5                 | SII          | RC           | 120                            | 2             | 4                                    | 2                                   | Y                   | Y    | N                    | N       | 50                    |                         |
| Alentejo | Evora      | Evora                 | 38°33'40.1"N<br>7°54'29.3"W | 1971              | 1976           | LC        | GS  | 1                     | CF       | 23,000       | 45.1       | S           | V          | FT             | 38                   | 3                    | 2                             | C              | 6.3                 | SI           | RC           | 240                            | 4             | 2                                    | 2                                   | N                   | Y    | N                    | Y       | 60                    | 200                     |
| Alentejo | Evora      | Pavia                 | 38°52'43.0"N<br>8°01'00.6"W | 1976              | 1979           | PS        | WU  | 2                     | CF       | 18,000       | 45.4       | S           | 2          | FT             | 29                   | 2                    | 1                             | C              | 6.5                 | SII          | RC           | 120                            | 2             | 2                                    | 1                                   | Y                   | Y    | N                    | Y       | 60                    | 200                     |
| Alentejo | Evora      | Reguengos de Monsaraz | 38°25'25.6"N<br>7°32'31.3"W | 1976              | 1979           | LC        | GS  | 1                     | CF       | 35,000       | 43.2       | S           | 2          | FT             | 41                   | 2                    | 1                             | C              | 6.5                 | SII          | RC           | 120                            | 2             | 2                                    | 1                                   | Y                   | Y    | N                    | Y       | 60                    | 200                     |
| Alentejo | Evora      | Vila Viçosa           | 38°46'45.8"N<br>7°25'34.0"W | 1973              |                |           | WU  | 4                     | R        | 2,300        |            |             |            |                |                      |                      |                               |                |                     |              |              |                                |               |                                      |                                     |                     |      |                      |         | Y                     |                         |
| Alentejo | Portalegre | Alter do Chão         | 39°12'03.1"N<br>7°39'21.0"W | 1969              |                | LC        | GS  | 1                     | R        | 8,000        | 37.5       | S           | F          | FT             | 14                   | 2                    | 1                             | C              | 5.5                 | SI           | RC           | 120                            | 2             | 1                                    | 1                                   | N                   | N    | N                    | N       | 50                    |                         |
| Alentejo | Portalegre | Elvas                 | 38°53'44.6"N<br>7°08'18.1"W | 1970              |                | LC        | GS  | 1                     | CF       | 15,000       | 47.0       | S           | 2          | FT             | 28                   | 3                    | 2                             | C              | 6.5                 | SII          | RC           | 240                            | 2             | 2                                    | 1                                   | Y                   | Y    | N                    | Y       | 80                    | 200                     |
| Alentejo | Portalegre | Fronteira             | 39°02'50.6"N<br>7°38'36.9"W | 1973              | 1979           | LC        | GS  | 1                     | R        | 16,000       | 43.2       | S           | 2          | FT             | 29                   | 2                    | 1                             | C              | 6.5                 | SII          | RC           | 120                            | 2             | 2                                    | 1                                   | Y                   | Y    | N                    | Y       | 30+80                 | 200                     |

|          |                   |                                  |                              |      |                |     |    |   |    |         |      |   |         |           |     |     |     |   |          |              |    |       |    |    |   |   |   |   |   |          |     |
|----------|-------------------|----------------------------------|------------------------------|------|----------------|-----|----|---|----|---------|------|---|---------|-----------|-----|-----|-----|---|----------|--------------|----|-------|----|----|---|---|---|---|---|----------|-----|
| Alentejo | Portalegre        | Portalegre                       | 39°11'58.7"N<br>7°27'47.3"W  | 1978 |                | PS  | WU | 2 | CF | 10,000  | 45.5 | S | 2       | FT        | 17  | 2   | 1   | C | 6.5      | SII          | RC | 120   | 2  | 2  | 1 | Y | Y | N | Y | 60       | 200 |
| Alentejo | Portalegre        | Vila de Boim                     | 38°51'43.8"N<br>7°16'22.0"W  | 1964 |                | PC  | R  | 3 | R  | 4,000   | 40.0 | S | F       | CT        | 14  | 3   |     | S | 2.0      | ST           | RB | 100   | 2  | 1  | 1 | N | N | N | N | 30       |     |
| Algarve  | Faro              | Santa Catarina da Fonte do Bispo | 37°09'13.8"N<br>7°47'07.4"W  | 1958 |                | LI  | R  | 3 | R  | 1,300   | 18.0 | S | F       | FT        | 14  | 2   | 1   | C | 3.6      | SII          | RC | 50    | 2  | 1  | 1 | N | N | N | N | 50       | Sur |
| Azores   | Punta Delgada     | Punta Delgada                    | 37°44'43.6"N<br>25°39'03.4"W | 1972 | 1978           | PC  | GS | 1 | R  | 34,000  | 45.0 | S | F       | FT        | 61  | 3   | 2   | C | 6.0      | SII          | RC | 120   | 3  | 4  | 4 | Y | Y | N | N | 60       |     |
| Azores   | Angra do Heroísmo | Angra do Heroísmo                | 38°39'17.0"N<br>27°12'46.3"W | 1953 | 1975           | PS  | WU | 1 | R  | 21,000  | 40.0 | S | F       | FT        | 35  | 3,2 | 2,1 | C | 6.5      | SII          | RC | 120   | 3  | 3  | 3 | Y | Y | N | N | 60       |     |
| Centro   | Castelo Branco    | Alcains                          | 39°55'12.4"N<br>7°26'09.1"W  | 1977 |                | PS  | WU | 2 | CF | 10,000  | 37.5 | S | 2       | FT        | 17  | 2   | 1   | C | 6.0      | SI           | RC | 120   | 2  | 2  | 1 | Y | Y | N | Y | 60+80    | 200 |
| Centro   | Leiria            | Caldas de Rainha                 | 39°24'08.6"N<br>9°08'21.7"W  | 1959 |                | PS  | WU | 2 | R  | 6,500   | 32.0 | S | F       | FT        | 18  | 3   | 2   | C | 5.5      | SI           | RC | 120   | 2  | 2  | 1 | N | N | N | Y | 50       | 200 |
| Centro   | Santarem          | Vale de Figueria                 | 39°18'59.4"N<br>8°37'43.5"W  | 1977 | 1979           | LPS | GS | 1 | CF | 24,000  | 37.0 | S | 2       | FT,<br>IT | 34  | 2   | 1   | C | 6.0      | SII,<br>SIII | RC | 120   | 4  | 2  | 1 | Y | Y | Y | Y | 60+100   | 200 |
| Lisboa   | Lisboa            | Beato                            | 38°44'06.3"N<br>9°06'09.8"W  | 1958 | 1962/75<br>/85 | LPS | GS | 1 | P  | 120,000 | 65.0 | S | 2       | FT,<br>IT | 128 | 3   | 2   | C | 7-<br>13 | SII,<br>SIII | RC | 1,000 | 13 | 8  | 9 | N | Y | Y | Y | 70+2x100 | 200 |
| Lisboa   | Lisboa            | Vila Franca de Xira              | 38°57'47.8"N<br>8°59'02.3"W  | 1956 |                | PC  | WU | 2 | R  | 6,500   | 33.0 | S | F       | FT        | 11  | 2   | 1   | C | 6.0      | SI           | RC | 120   | 2  | 1  | 1 | N | N | N | Y | 30       | 200 |
| Lisboa   | Setubal           | Caparica e Trafaria              | 38°40'21.9"N<br>9°14'15.9"W  | 1986 |                | LPS | GS | 1 | P  | 200,000 | 60.0 | S | 2       | CT        | 114 | 4,3 | 3,2 | C | 8-<br>10 | SIII         | RC | 3,000 | 14 | 10 | 8 | N | Y | Y | N | 5x100    |     |
| Madeira  | Funchal           | Funchal                          | 32°38'33.6"N<br>16°55'00.1"W | 1984 |                | PS  | WU | 4 | P  | 16,000  | 47.0 | S | F       | FT        | 21  | 3   | 2   | C | 6.0      | SII          | RC | 240   | 3  | 3  | 3 | Y | Y | N | N | 60       |     |
| Norte    | Braganza          | Braganza                         | 41°48'01.1"N<br>6°46'13.2"W  | 1973 | 1978           | M   | R  | 3 | CF | 12,000  | 37.7 | S | F       | FT        | 20  | 2   | 1   | C | 6.5      | SIII         | RC | 120   | 2  | 2  | 1 | Y | Y | N | Y | 80       | 200 |
| Norte    | Braganza          | Mogadouro                        | 41°20'02.2"N<br>6°39'02.7"W  | 1973 |                | PS  | WU | 2 | R  | 6,000   | 37.5 | S | F       | FT        | 11  | 2   | 1   | C | 6.5      | SIII         | RC | 120   | 2  | 1  | 1 | N | Y | N | Y | 80       | 200 |
| Norte    | Oporto            | Leixoes. Matosinhos              | 41°12'00.3"N<br>8°40'54.3"W  | 1978 | 1980           | LPS | GS | 1 | P  | 100,000 | 60.0 | S | F-<br>2 | FT        | 76  | 3   | 2   | C | 8.0      | SII          | RC | 1,000 | 5  | 3  | 3 | N | Y | Y | Y | 2x100    | 200 |

**Geolocation:** coordinates ETRS 89 Use 30. **Ownership:** PS: Portuguese state; LC: lease to cooperative; LPC: lease to private company; LI: lease to institute; PC: private company; M: municipality **Use:** GS: grain storage; R: reused; WU: without use. **State of conservation:** 1: in use; 2: abandoned and poor condition; 3: rehabilitated; 4: demolish. **Category:** R: regional; CF: concentration or final; P: Port. **Ground plan:** S: square; L: L-shape. **Roof shape:** F: flat roof; 2: gable roof; F-2: flat and gable roof; V: vaulted roof. **Tower position:** FT: front tower; ST: side tower; CT: corner tower; IT: interior tower. **Form of cells:** CI: circular; S: Square. **Façade types:** ST: straight; SI: semicircular type I: Consisting of straight façade, semi-circular façade and straight façade; SII: semicircular type II: Consisting of semi-circular façade and straight façade; SIII: semicircular type III: Consisting of semi-circular façade only. **Cell construction material:** RB: reinforced brick; RC: reinforced concrete. **Railway:** Y: exist; N: does not exist. **Firefighting system:** Y: exist; N: does not exist. **Lift:** Y: exist; N: does not exist. **Thermometric sensors:** Y: exist; N: does not exist.

**Supplementary Materials. Table S2.-** Indicators for 30 villages in Portugal, sites of 31 silos.

| Region   | District          | Village                          | Population | Demographic pattern | Annual village budget (€) | Economic activity | Land communications | Distance to major urban centre (km)                                                                    |
|----------|-------------------|----------------------------------|------------|---------------------|---------------------------|-------------------|---------------------|--------------------------------------------------------------------------------------------------------|
| Alentejo | Beja              | Aljustrel                        | 8,879      | -1                  | 37,481,577                | 1                 | N                   | Beja 37, Evora 96, Faro 130, Lisboa 164                                                                |
| Alentejo | Beja              | Beja                             | 33,401     | 0                   | 40,540,647                | 1, 3              | N, T                | Evora 80, Faro 147, Lisboa 176                                                                         |
| Alentejo | Beja              | Cuba                             | 4,378      | -1                  | 7,979,609                 | 1, 3              | P                   | Beja 20, Evora 67, Faro 166, Lisboa 177                                                                |
| Alentejo | Beja              | Ferreira do Alentejo             | 7,686      | -1                  | 20,053,091                | 1, 3              | N                   | Beja 24, Evora 74, Faro 149, Lisboa 153                                                                |
| Alentejo | Beja              | Mertola                          | 8,712      | -2                  | 19,041,908                | 1, 3              | P                   | Beja 53, Ayamonte 67, Huelva 114, Faro 117, Lisboa 234                                                 |
| Alentejo | Beja              | Moura                            | 13,259     | -2                  | 35,095,085                | 1, 3              | N                   | Beja 52, Evora 78, Sevilla 185, Faro 203, Lisboa 209                                                   |
| Alentejo | Beja              | Serpa                            | 13,764     | -1                  | 27,762,400                | 1, 2, 3           | N                   | Beja 28, Evora 102, Faro 166, Sevilla 203, Lisboa 203                                                  |
| Alentejo | Evora             | Estremoz                         | 13,683     | -1                  | 20,169,328                | 1, 2, 3           | N, M                | Elvas 43, Evora 47, Badajoz 72, Beja 125, Lisboa 171                                                   |
| Alentejo | Evora             | Evora                            | 53,591     | 0                   | 49,824,915                | 2, 3              | N, M, T             | Beja 80, Badajoz 101, Lisboa 134                                                                       |
| Alentejo | Evora             | Pavia                            | 932        | -1                  | 2,400,674                 | 1                 | N                   | Evora 38, Elvas 91, Badajoz 104, Lisboa 143                                                            |
| Alentejo | Evora             | Reguengos de Monsaraz            | 9,871      | -1                  | 14,241,037                | 1                 | N, T                | Evora 39, Badajoz 99, Lisboa 170                                                                       |
| Alentejo | Evora             | Vila Viçosa                      | 8,871      | 0                   | 11,672,154                | 1, 2, 3           | N                   | Elvas 31, Badajoz 58, Evora 63, Lisboa 187                                                             |
| Alentejo | Portalegre        | Alter do Chão                    | 3,044      | -1                  | 9,481,442                 | 1                 | N                   | Elvas 62, Evora 93, Badajoz 79, Lisboa 195                                                             |
| Alentejo | Portalegre        | Elvas                            | 20,753     | 0                   | 30,828,796                | 1, 2, 3           | N, M, T             | Badajoz 20, Evora 84, Lisboa 208                                                                       |
| Alentejo | Portalegre        | Fronteira                        | 2,858      | -2                  | 5,303,650                 | 1                 | N                   | Elvas 53, Evora 74, Badajoz 77, Lisboa 180                                                             |
| Alentejo | Portalegre        | Portalegre                       | 22,341     | -1                  | 27,666,431                | 1, 2, 3           | N, M, T             | Elvas 58, Badajoz 68, Evora 103, Caceres 128, Lisboa 227                                               |
| Alentejo | Portalegre        | Vila de Boim                     | 2,109      | -1                  | 3,132,941                 | 1,                | N, M                | Elvas 10, Badajoz 33, Evora 73, Lisboa 197                                                             |
| Algarve  | Faro              | Santa Catarina da Fonte do Bispo | 2,085      | 1                   | 2,506,847                 | 1, 3              | N, M                | Faro 26, Albufeira 54, Lagoa 73, Lagos 104                                                             |
| Azores   | Punta Delgada     | Punta Delgada                    | 67,287     | 1                   | 38,215,821                | 1, 2, 3           | N, M, Port, Airport | Flights to many European capitals especially between April and October. Port of call for cruise ships. |
| Azores   | Angra do heroismo | Angra do Heroismo                | 35,402     | 0                   | 26,291,101                | 1, 2, 3           | N, M, Port, Airport | Flights to many European capitals especially between April and October.                                |
| Centro   | Castelo Branco    | Alcains                          | 4,615      |                     | 4,943,975                 | 2, 3              | N, M, T             | Castelo Branco 12, Guarda 89, Coimbra 148, Lisboa 230                                                  |
| Centro   | Leiria            | Caldas de Rainha                 | 50,917     | 0                   | 36,864,045                | 2, 3              | N, M, T             | Santarem 56, Lisboa 93, Entrocamento 91                                                                |
| Centro   | Santarem          | Vale de Figueria                 | 1,294      | -1                  | 982,151                   | 1                 | P                   | Santarem 12, Entroncamento 29, Lisboa 91                                                               |
| Lisboa   | Lisboa            | Beato                            | 14,241     | 0                   | 33,927,384                | 2, 3              | N, M, T, Port       | Lisboa 5, Santarem 79, Evora 132                                                                       |
| Lisboa   | Lisboa            | Vila Franca de Xira              | 137,540    | 1                   | 78,891,043                | 2, 3              | N, M, T             | Lisboa 35, Santarem 51, Entroncamento 87                                                               |
| Lisboa   | Setubal           | Trafaria                         | 26,357     | 0                   | 146,545,738               | 1, 2, 3           | P, Port             | Lisboa 16, Evora 134, Badajoz 227                                                                      |
| Madeira  | Funchal           | Funchal                          | 105,795    | 1                   | 104,080,116               | 2, 3              | N, M, Port, Airport | Flights to many European capitals especially between April and October. Port of call for cruise ships. |
| Norte    | Braganza          | Braganza                         | 34,582     | 0                   | 46,148,600                | 1,2, 3            | N, M,               | Zamora 103, Vila Real 118, Oporto 207, Braga 217                                                       |
| Norte    | Braganza          | Mogadouro                        | 8,304      | -2                  | 10,985,000                | 1                 | N, M                | Braganza 74, Mirandela 78, Zamora 101, Vila Real 125, Salamanca 133                                    |
| Norte    | Oporto            | Matosinhos                       | 172,577    | 0                   | 133,272,282               | 2, 3              | N, M, T             | Oporto 9, Braga 59, Viana do Castelo 70                                                                |

Demographic pattern: -2: significant decline; -1: slight decline; 0: stable; 1: slight rise; 2: significant rise. Economic activity: 1: primary sector; 2: secondary sector; 3: tertiary sector. Land communication: P: poor; N: national road; M: motorway; T: railway
